# Supplementary material for: Optimal Time Interval between Neoadjuvant Platinum-Based Chemotherapy and Interval Debulking Surgery in High-Grade Serous Ovarian Cancer
Source: MDPI journal article supplement (doi:10.3390/cancers15133519), 2023-07-06
Supplement: s1 [file s1]

## SUPPLEMENTARY MATERIAL

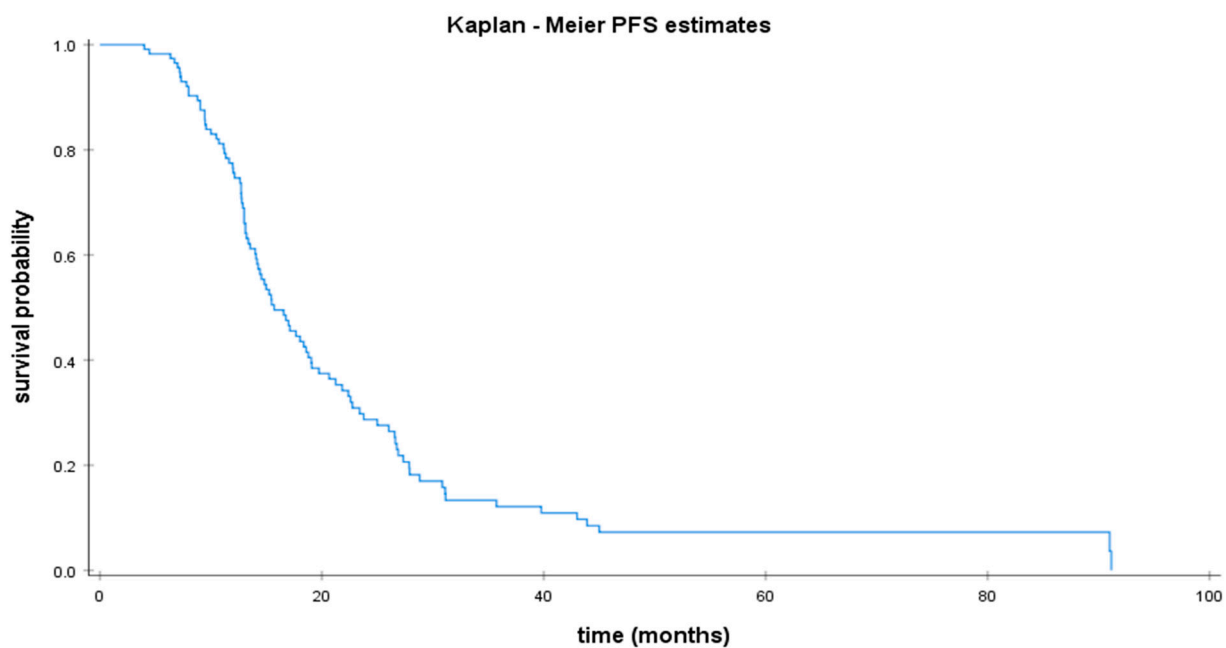

**Supplemental Figure S1.** Kaplan Meier curve for PFS in the overall population

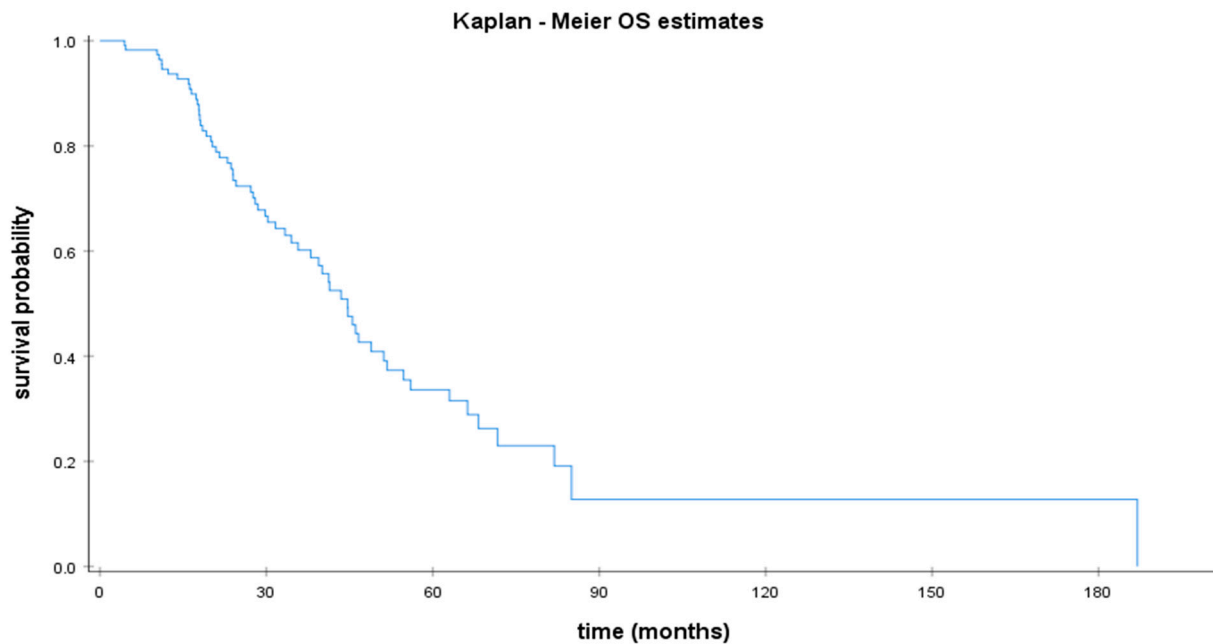

**Supplemental Figure S2.** Kaplan Meier curve for OS in the overall population
